# Supplementary material for: 2019 Novel Coronavirus (COVID-19) Pandemic: Built Environment Considerations To Reduce Transmission
Source: PubMed Central journal article supplement (PMC7141890; doi:10.1128/msystems.00245-20), 2020-04-07
Supplement: mSystems.00245-20_review_history.pdf [file mSystems.00245-20_review_history.pdf]

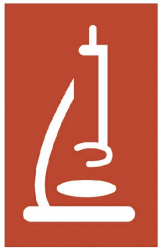

AMERICAN  
SOCIETY FOR  
MICROBIOLOGY

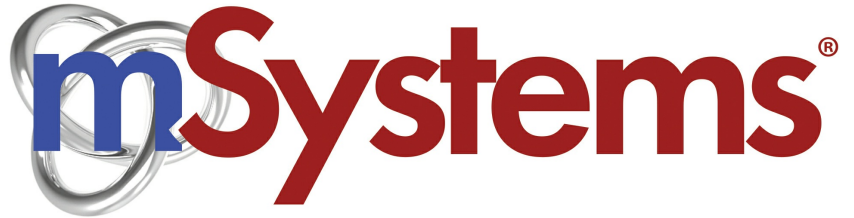

# 2019 Novel Coronavirus (COVID-19) Outbreak: A Review of the Current Literature and Built Environment Considerations to Reduce Transmission

Leslie Dietz, Patrick Horve, David Coil, Mark Fretz, Jonathan Eisen, and Kevin Van Den Wymelenberg

*Corresponding Author(s): Patrick Horve, University of Oregon*

---

## Review Timeline:

Submission Date:

March 18, 2020

Accepted:

March 19, 2020

---

*Editor: Jack Gilbert*

## Transaction Report:

(Note: With the exception of the correction of typographical or spelling errors that could be a source of ambiguity, letters and reports are not edited. The original formatting of letters and referee reports may not be reflected in this compilation.)

**DOI: <https://doi.org/10.1128/mSystems.00245-20>**

March 19, 2020

Dr. Patrick Finn Horve  
University of Oregon  
Biology and the Built Environment Center  
Eugene, OR 97403

Re: mSystems00245-20 (2019 Novel Coronavirus (COVID-19) Outbreak: A Review of the Current Literature and Built Environment Considerations to Reduce Transmission)

Dear Dr. Patrick Finn Horve:

Thank you for the timely review - I have read through the whole article and am amazed by the quality of the writing and breadth of the focus. Great work.

Given the relevance to the SARS-CoV-2 outbreak, we are expediting publishing this Review after editorial review, foregoing our normal external review process.

Your manuscript has been accepted, and I am forwarding it to the ASM Journals Department for publication. For your reference, ASM Journals' address is given below. Before it can be scheduled for publication, your manuscript will be checked by the mSystems senior production editor, Ellie Ghatineh, to make sure that all elements meet the technical requirements for publication. She will contact you if anything needs to be revised before copyediting and production can begin. Otherwise, you will be notified when your proofs are ready to be viewed.

As an open-access publication, mSystems receives no financial support from paid subscriptions and depends on authors' prompt payment of publication fees as soon as their articles are accepted. You will be contacted separately about payment when the proofs are issued; please follow the instructions in that e-mail. Arrangements for payment must be made before your article is published. For a complete list of **Publication Fees**, including supplemental material costs, please visit our [website](#).

Corresponding authors may [join or renew ASM membership](#) to obtain discounts on publication fees. Need to upgrade your membership level? Please contact Customer Service at [Service@asmusa.org](mailto:Service@asmusa.org).

Thank you for submitting your paper to mSystems.

Sincerely,

Editor  
Editor, mSystems

Journals Department  
American Society for Microbiology  
1752 N St., NW  
Washington, DC 20036  
E-mail: [peerreview@asmusa.org](mailto:peerreview@asmusa.org)  
Phone: 1-202-942-9338
